# Supplementary material
Source: publisher site journal article supplement (https://static.cambridge.org/content/id/urn:cambridge.org:id:article:S0022109016000442/resource/name/JFQ1600044supp.zip)
Supplement: Supplementary file 1 [file JFQ1600044supp.zip]

Archive with 1 entries (1 files):
- Internet Appendix (SUPP MAT).pdf
